## Correction: Elevated microRNA-135a is associated with pulmonary arterial hypertension in experimental mouse model

Hyun-Wook Lee<sup>1</sup>, Gabriele Grunig<sup>1</sup> and Sung-Hyun Park<sup>1</sup>

<sup>1</sup> Department of Environmental Medicine, New York University School of Medicine, Tuxedo, New York, USA

**Published:** August 29, 2017

Copyright: Lee et al. This is an open-access article distributed under the terms of the Creative Commons Attribution License 3.0 (CC BY 3.0), which permits unrestricted use, distribution, and reproduction in any medium, provided the original author and source are credited.

**This article has been corrected:** Dr. Gabriele Grunig was added to the author list.  
The authors sincerely apologize for this oversight.

Original article: Oncotarget. 2017; 8:35609-35618. <https://doi.org/10.18632/oncotarget.16011>
